# Supplementary material
Source: PubMed Central journal article supplement (PMC1622857)

**A**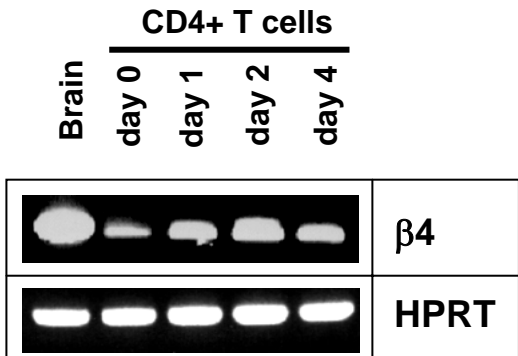**B**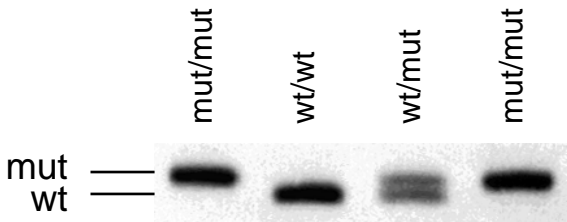

Supplement: pnas_0607262103_1.pdf [file pnas_0607262103_1.pdf]

**A**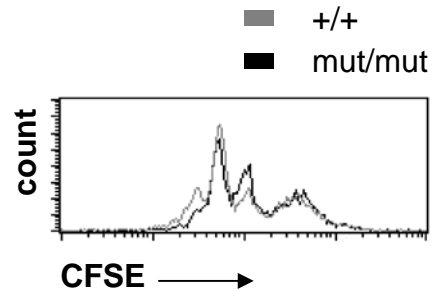**B**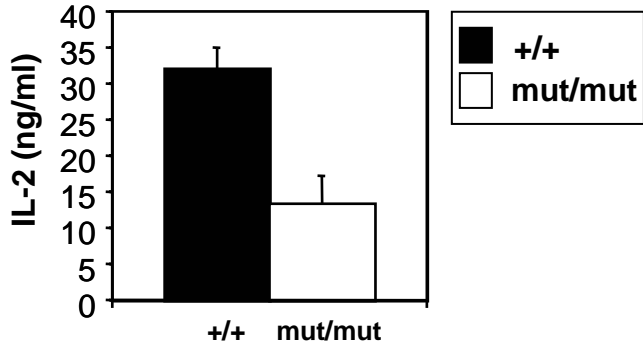

Supplement: pnas_0607262103_4.pdf [file pnas_0607262103_4.pdf]

IFN $\gamma$

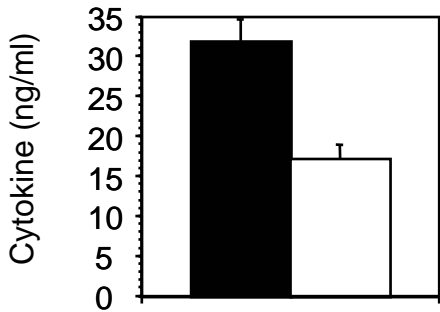

IL-4

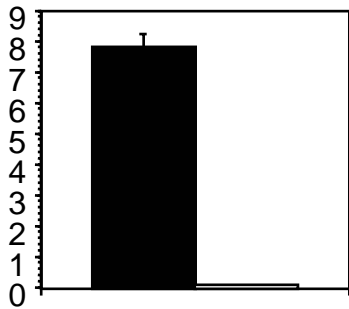

CD3 ( $\mu$ g/ml)  
CD28 ( $\mu$ g/ml)

10      10  
2        2

10      10  
2        2

Supplement: pnas_0607262103_5.pdf [file pnas_0607262103_5.pdf]

60 second

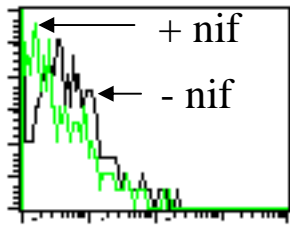

120 second

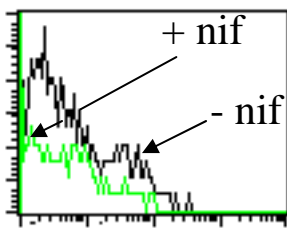

KCl

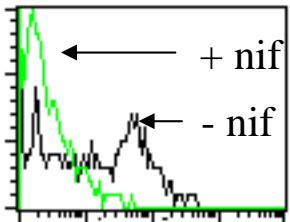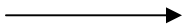

DiBAC4(3)

Supplement: pnas_0607262103_6.pdf [file pnas_0607262103_6.pdf]
